# Supplementary material for: Loss of Control over Eating, Inhibitory Control, and Reward Sensitivity in Children and Adolescents: A Systematic Review
Source: MDPI journal article supplement (doi:10.3390/nu15122673), 2023-06-08
Supplement: s1 [file s1]

*Supplementary Material*

**Table S1.** Search strategy.

| Search | Search Queries                                                                                                                                             |
|--------|------------------------------------------------------------------------------------------------------------------------------------------------------------|
| #1     | Title, Abstract and Keywords adolescence OR adolescents OR child OR children OR youth                                                                      |
| #2     | Title, Abstract and Keywords “executive function*” OR inhibition OR “inhibitory control” OR reward OR “reward sensitivity” OR impulsivity                  |
| #3     | Title, Abstract and Keywords “loss of control over eating” OR “loss of control eating” OR “uncontrolled eating” OR “dysregulated eating” OR “binge eating” |
| #4     | #1 AND #2 AND #3                                                                                                                                           |
| #5     | #4, from 2000 to 2021 (February)                                                                                                                           |
